# Supplementary material for: Toward Isolation of Palytoxins: Liquid Chromatography Coupled to Low- or High-Resolution Mass Spectrometry for the Study on the Impact of Drying Techniques, Solvents and Materials
Source: MDPI journal article supplement (doi:10.3390/toxins13090650), 2021-09-14
Supplement: s1 [file s1]

# Supplementary Materials: Toward Isolation of Palytoxins: Liquid Chromatography Coupled to Low- or High-Resolution Mass Spectrometry for the Study on the Impact of Drying Techniques, Solvents, And Materials

Antonia Mazzeo, Michela Varra, Luciana Tartaglione, Patrizia Ciminiello, Zita Zendong, Philipp Hess and Carmela Dell'Aversano

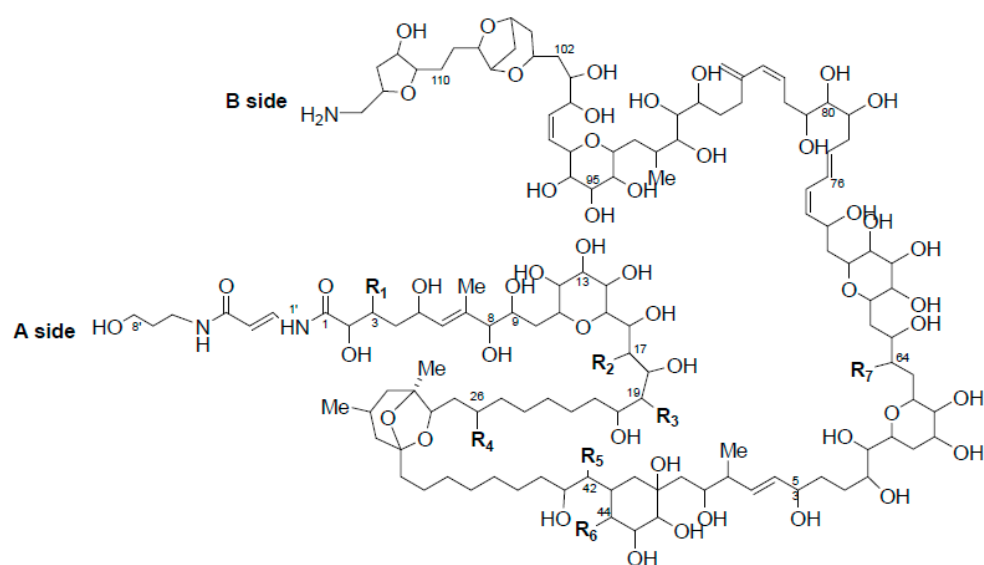

|                            | R <sub>1</sub> | R <sub>2</sub> | R <sub>3</sub> | R <sub>4</sub> | R <sub>5</sub> | R <sub>6</sub> | R <sub>7</sub> |
|----------------------------|----------------|----------------|----------------|----------------|----------------|----------------|----------------|
| <b>Palytoxin</b>           | Me             | OH             | OH             | Me             | H              | OH             | OH             |
| <b>42-Hydroxypalytoxin</b> | Me             | OH             | OH             | Me             | OH             | OH             | OH             |
| <b>Ovatoxin-a</b>          | Me             | H              | OH             | Me             | OH             | H              | H              |
| <b>Ostreocin-D</b>         | H              | OH             | H              | H              | OH             | H              | OH             |

**Figure S1.** Planar structure of some palytoxin congeners including palytoxin and 42-hydroxypalytoxin from *Palythoa* spp. and ovatoxin-a and ostreocin-D from *Ostreopsis* spp.

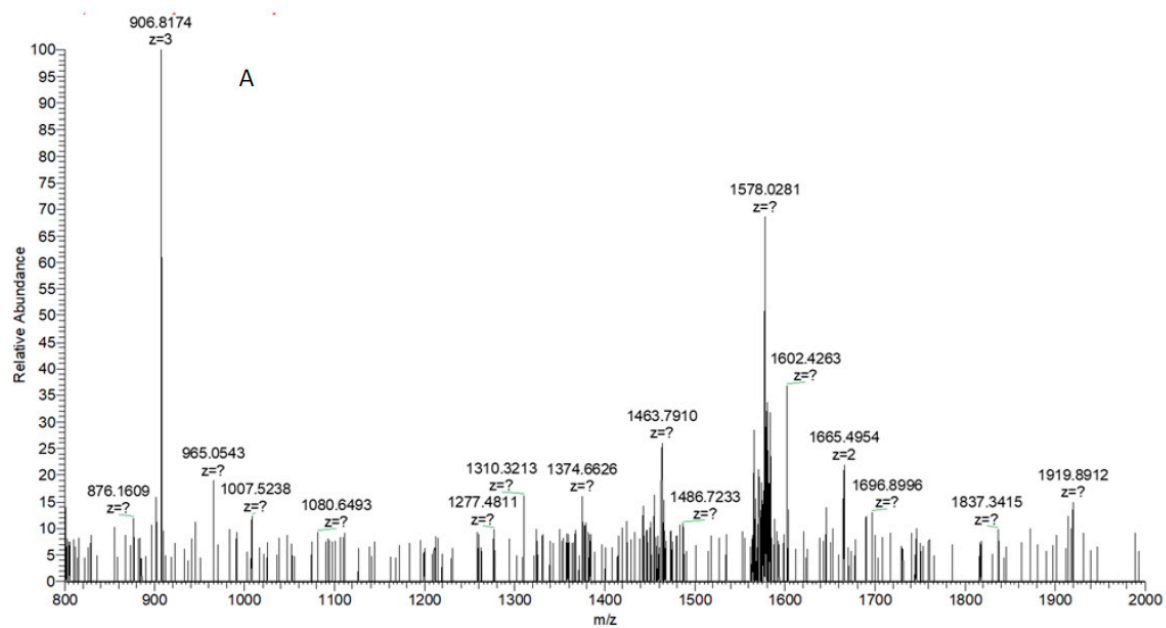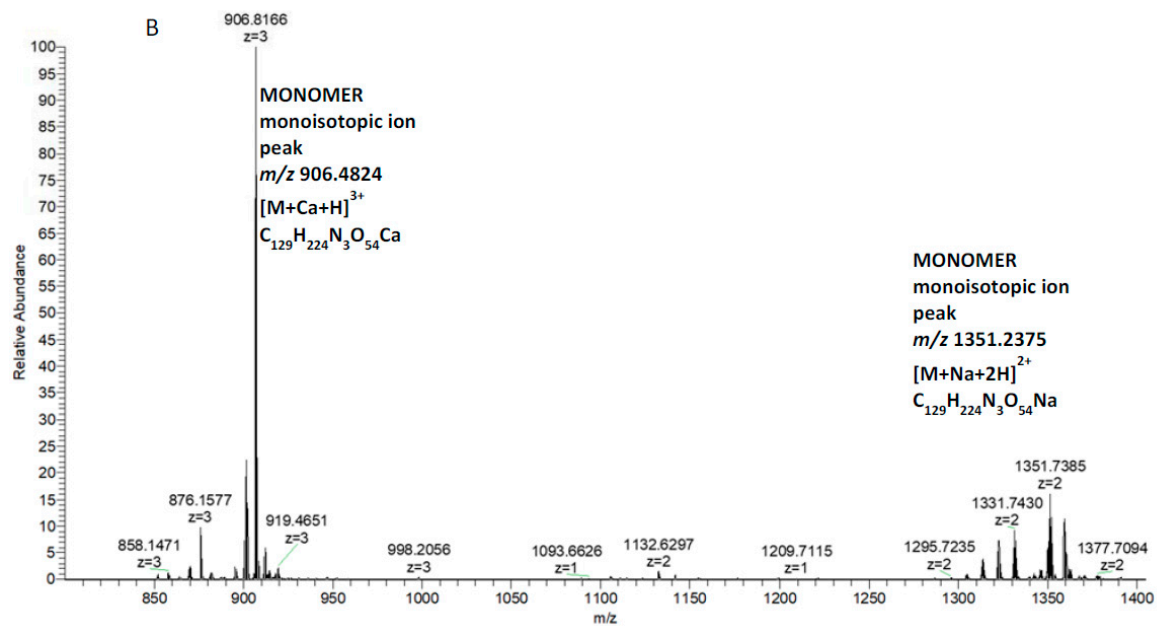

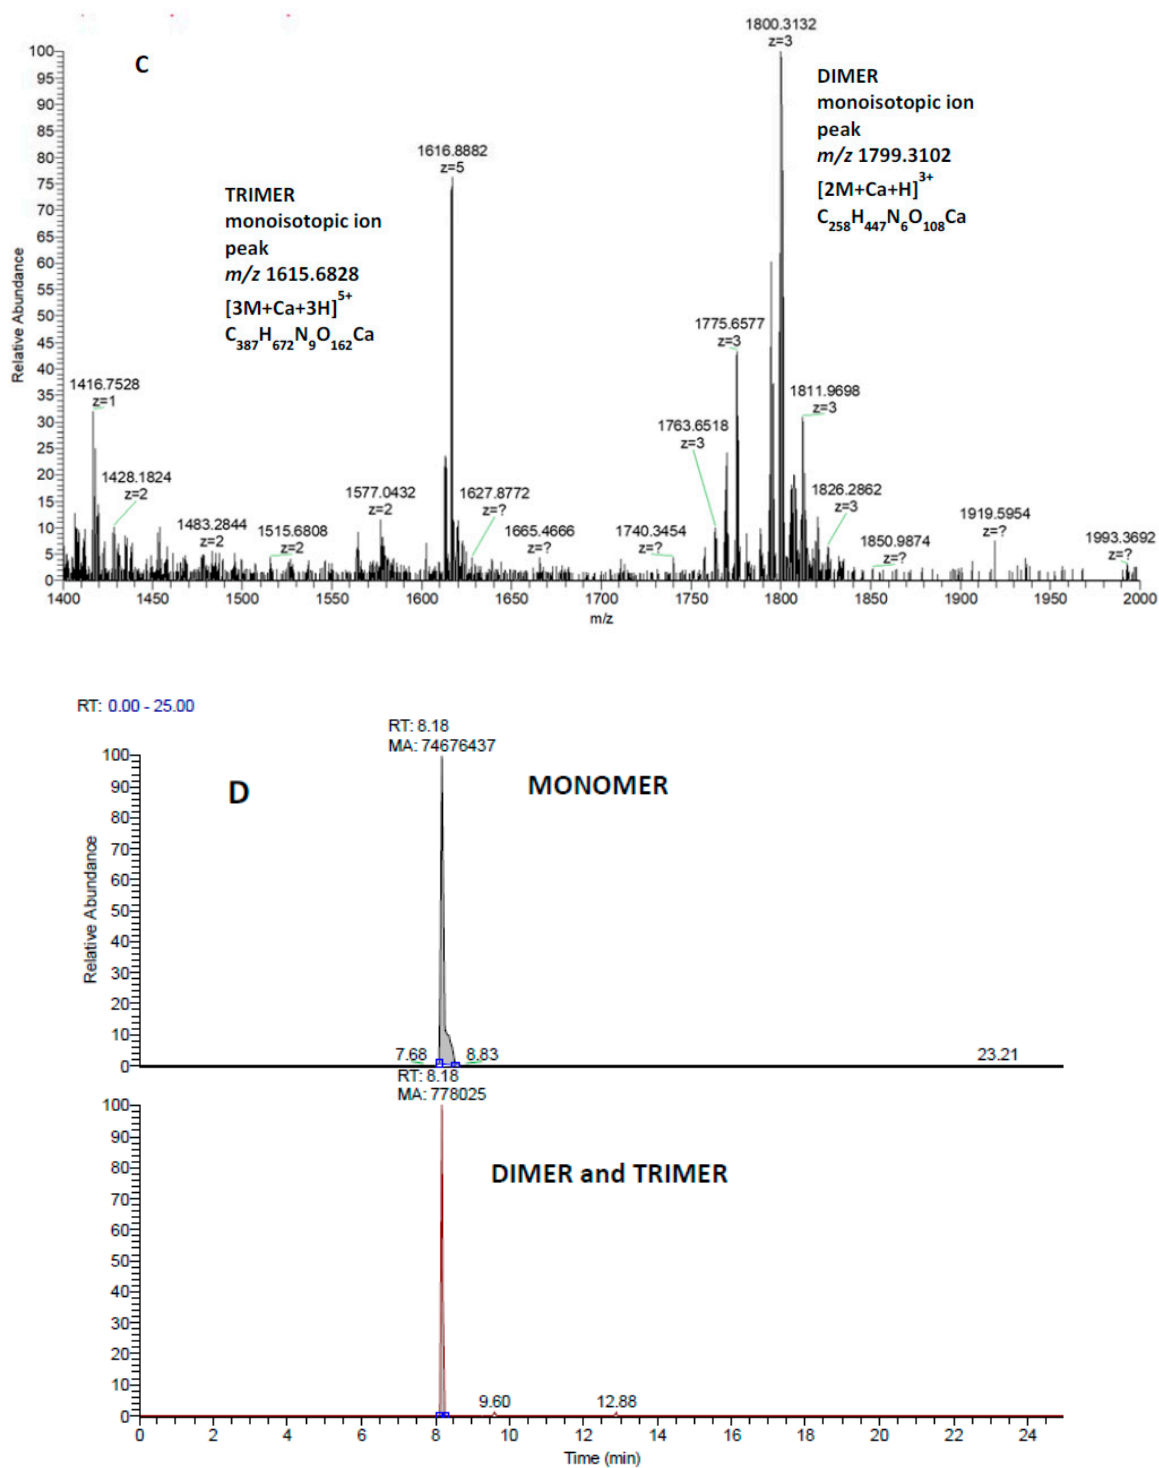

**Figure S2.** (A) Full HRMS spectrum of PLTX in 100% water in the mass range  $m/z$  800–2000. (B) Full HRMS spectrum of PLTX in the mass range  $m/z$  800–1400. (C) Full HRMS spectrum of PLTX in the mass range  $m/z$  1400–2000. The spectra were acquired simultaneously in three different scan events. (D) extracted ion chromatogram of the main monomer ions ( $m/z$  906.8166; 1351.7385) and of the main dimer and trimer ions ( $m/z$  1616.8882; 1800.3132).

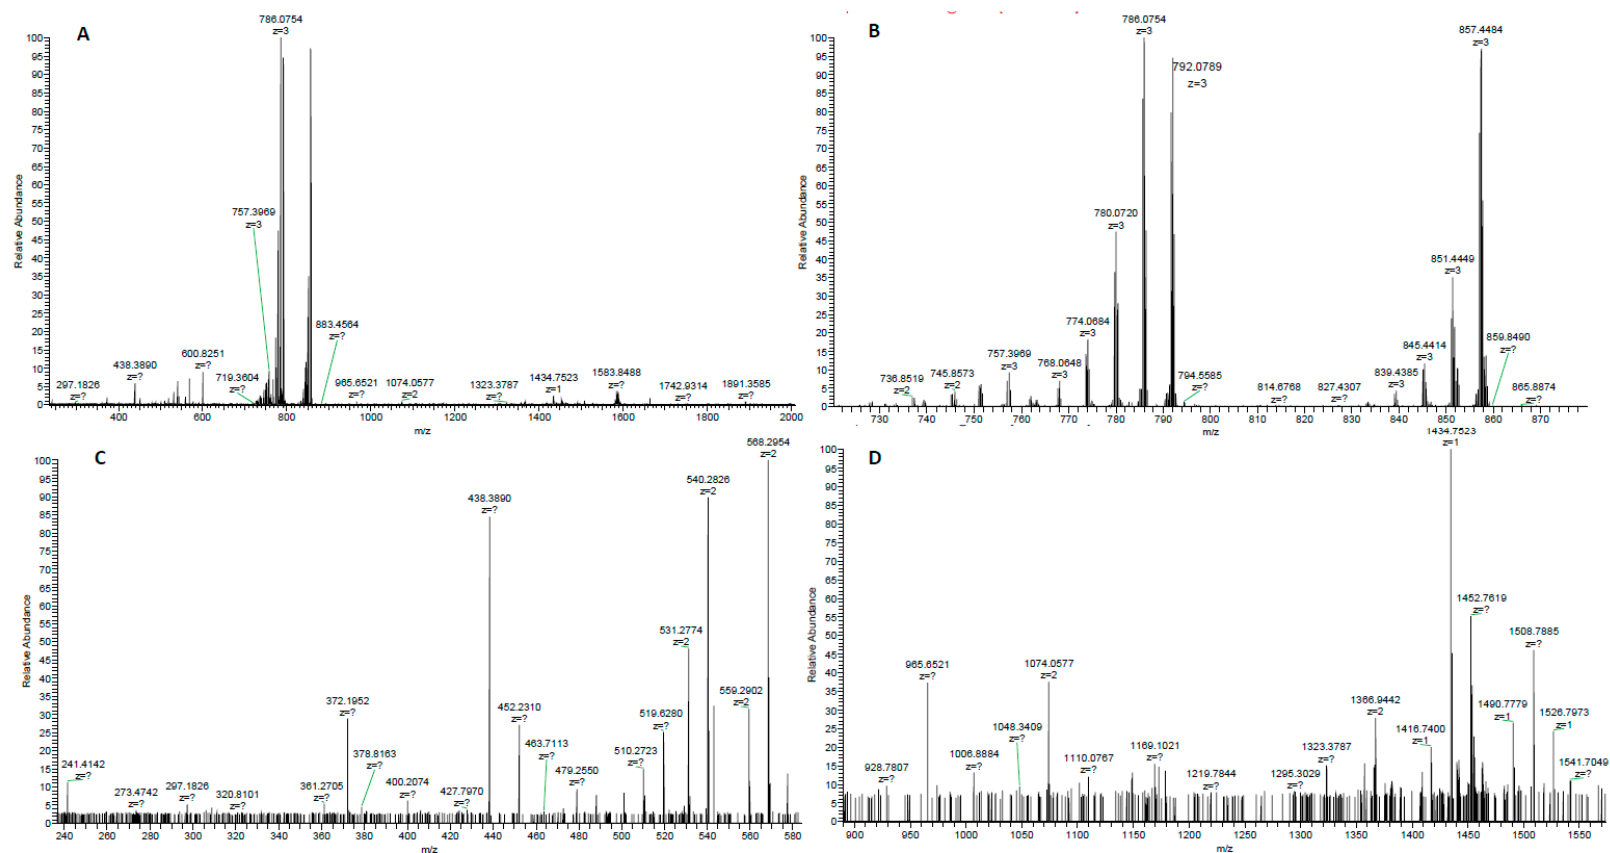

**Figure S3.** (A) HRMS<sub>2</sub> spectrum of PLTX methyl ester in the  $m/z$  range 0–2000. (B) HRMS<sub>2</sub> spectrum of PLTX methyl ester zoomed in the  $m/z$  range 720–880. (C) HRMS<sub>2</sub> spectrum of PLTX methylester zoomed in the  $m/z$  range 230–580. (D) MS<sub>2</sub> spectrum of PLTX methyl ester zoomed in the  $m/z$  range 900–1580. Several fragment ions due to water losses the precursor ion at  $m/z$  869.4 are the following:  $m/z$  857.1187 ( $-2\text{H}_2\text{O}$ )  $\text{C}_{124}\text{H}_{212}\text{NO}_{51}\text{Ca}$ ,  $m/z$  851.1155 ( $-3\text{H}_2\text{O}$ )  $\text{C}_{124}\text{H}_{210}\text{NO}_{50}\text{Ca}$ ,  $m/z$  845.1123 ( $-4\text{H}_2\text{O}$ )  $\text{C}_{124}\text{H}_{208}\text{NO}_{49}\text{Ca}$ ,  $m/z$  839.1069 ( $-5\text{H}_2\text{O}$ )  $\text{C}_{124}\text{H}_{206}\text{NO}_{48}\text{C}$  not shown in Table 4 in the main text.

**Table S1.** Transitions and MS parameters used in Multiple Reaction Monitoring (MRM) experiments on Instrument 1 (Source settings: curtain gas 30 psi, ion spray 5000 V, turbogas temperature 300 °C, declustering potential 56 V, Dwell time 500 or 250 ms for PLTX or OA respectively, entrance potential 10 V, Gas 1 and Gas 2 30 and 40 psi, respectively).

|      | Q1                                    |        | Q3                                                      |       | Collision Energy (eV) | Cells Exit Potential (V) |
|------|---------------------------------------|--------|---------------------------------------------------------|-------|-----------------------|--------------------------|
|      | Precursor                             | m/z    | Precursor                                               | m/z   |                       |                          |
| PLTX | [M+2H] <sup>2+</sup>                  | 1340.9 | [A moiety+H-H <sub>2</sub> O] <sup>+</sup> <sup>a</sup> | 327.3 | 47                    | 20                       |
|      | [M+2H-H <sub>2</sub> O] <sup>3+</sup> | 1331.9 | [A moiety+H-H <sub>2</sub> O] <sup>+</sup>              | 327.3 | 47                    | 20                       |
|      | [M+3H-H <sub>2</sub> O] <sup>3+</sup> | 887.8  | [A moiety+H-H <sub>2</sub> O] <sup>+</sup> <sup>a</sup> | 327.3 | 31                    | 18                       |
| OA   | [M+NH <sub>4</sub> ] <sup>+</sup>     | 822.5  | [M+H-H <sub>2</sub> O] <sup>+</sup>                     | 787.3 | 17                    | 20                       |
|      | [M+NH <sub>4</sub> ] <sup>+</sup>     | 822.5  | [M+H-2H <sub>2</sub> O] <sup>+</sup>                    | 769.4 | 23                    | 12                       |
|      | [M+NH <sub>4</sub> ] <sup>+</sup>     | 822.5  | [M+H-3H <sub>2</sub> O] <sup>+</sup>                    | 751.4 | 29                    | 18                       |
|      | [M+NH <sub>4</sub> ] <sup>+</sup>     | 822.5  | [M+H] <sup>+</sup>                                      | 805.4 | 13                    | 12                       |

<sup>a</sup>A moiety is the PLTX part structure stretching from A-side terminal to C8 (Figure S1).

**Table S2.** The intensity of PLTX (1.0 µg/mL) mass peaks diluted in different solvents and blends. The samples were prepared in glass vials.

| PLTX diluted in       | Average area | STD    |
|-----------------------|--------------|--------|
| H <sub>2</sub> O 100% | 273509       | 193193 |
| MeOH 10%              | 3574802      | 517672 |
| MeOH 30%              | 3534432      | 600363 |
| MeOH 50%              | 3685748      | 463429 |
| MeOH 80%              | 2886110      | 237643 |
| EtOH 80%              | 2751877      | 455188 |
| IsoPrOH 80%           | 2384957      | 490035 |
| MeOH 100%             | 1362005      | 282464 |
| EtOH 100%             | 840114       | 363923 |
| IsoPrOH 100%          | 314914       | 233285 |

**Table S3.** Recoveries of PLTX (125 ng/mL, 1.0 mL) following complete drying performed with N<sub>2</sub> stream in PP and Teflon tubes, normal and silanized glass vials. The samples were re-dissolved in 300 µL of the initial solvent/blend. Recoveries are expressed in % ±RSD.

| PLTX                            | Recovery % (n = 3)*                                    |        |              |                 |
|---------------------------------|--------------------------------------------------------|--------|--------------|-----------------|
|                                 | Complete drying and re-dissolution in original solvent |        |              |                 |
|                                 | PP                                                     | Teflon | Normal Glass | Silanized Glass |
| 80% MeOH in H <sub>2</sub> O    | 40±13                                                  | 63±11  | 58±6         | 55±6            |
| 80% EtOH in H <sub>2</sub> O    | 59±8                                                   | 97±11  | 32±2         | 13±3            |
| 80% IsoPrOH in H <sub>2</sub> O | 23±2                                                   | 87±21  | 30±3         | 11±1            |
| 100% MeOH                       | 27±1                                                   | 76±3   | 28±8         | 33±2            |
| 100% EtOH                       | 16±7                                                   | 37±12  | nd           | nd              |
| 100 IsoPrOH                     | nd                                                     | nd     | nd           | nd              |

\* n = number of replicates, nd = not detected.

**Table S4.** Recoveries of PLTX at different initial concentration (initial volume 1.0 mL) following complete drying performed with N<sub>2</sub>-stream in Teflon tubes. The samples were dissolved in 80% aqueous MeOH and re-dissolved in 300 µL or 1.0 mL of 50% aqueous MeOH. Recoveries are expressed in % ±RSD.

| Re-dissolution in MeOH 50% aqueous methanol |                   |             |              |           |
|---------------------------------------------|-------------------|-------------|--------------|-----------|
| PLTX ng/mL                                  | Recovery% (n = 3) |             | Loss% (ng)** |           |
|                                             | 300 $\mu$ L       | 1 mL        | 300 $\mu$ L  | 1 mL      |
| 62.5                                        | 47 $\pm$ 10       | 52 $\pm$ 16 | 83 (33.1)    | 48 (30)   |
| 125                                         | 48 $\pm$ 3        | 59 $\pm$ 8  | 52 (65)      | 41 (51.2) |
| 250                                         | 72 $\pm$ 7        | 77 $\pm$ 12 | 28 (70)      | 23 (57.5) |
| 500                                         | 86 $\pm$ 6        | 86 $\pm$ 4  | (14 (70)     | 14 (70)   |

\* n = number of replicates, \*\* = The PLTX loss is expressed both in percentage and in the corresponding ng, the latter value is reported in the brackets.

**Table S5.** Recoveries of PLTX (125 ng/mL, 1.0 mL) following concentration at 200  $\mu$ L under N<sub>2</sub>-stream in PP and Teflon tubes, normal and silanized glass vials. Recoveries are expressed in %  $\pm$ RSD.

| PLTX in                         | Recovery % (n = 3)* Concentration in |             |              |                 |
|---------------------------------|--------------------------------------|-------------|--------------|-----------------|
|                                 | PP                                   | Teflon      | Normal Glass | Silanized Glass |
| 80% MeOH in H <sub>2</sub> O    | -                                    | -           | -            | -               |
| 80% EtOH in H <sub>2</sub> O    | -                                    | -           | 66 $\pm$ 17  | 69 $\pm$ 12     |
| 80% IsoPrOH in H <sub>2</sub> O | -                                    | -           | 80 $\pm$ 2   | 76 $\pm$ 4      |
| 100% MeOH                       | 86 $\pm$ 2                           | 89 $\pm$ 5  | 60 $\pm$ 10  | 47 $\pm$ 17     |
| 100% EtOH                       | 83 $\pm$ 6                           | 86 $\pm$ 1  | -            | -               |
| 100 IsoPrOH                     | 47 $\pm$ 17                          | 57 $\pm$ 12 | -            | -               |

\*n=number of replicates.
